# Supplementary material for: Implications of Regurgitative Feeding on Plastic Loads in Northern Fulmars (Fulmarus glacialis): A Study from Svalbard
Source: PubMed Central journal article supplement (PMC9996815; doi:10.1021/acs.est.2c05617), 2023-02-22
Supplement: es2c05617_si_001.pdf [file es2c05617_si_001.pdf]

# Implications of regurgitative feeding on plastic loads in Northern Fulmars (*Fulmarus glacialis*): A study from Svalbard

Felix Tulatz<sup>1,2\*</sup>, Geir Wing Gabrielsen<sup>2</sup>, Sophie Bourgeon<sup>1</sup>, Dorte Herzke<sup>1,3</sup>, Rupert Krapp<sup>2</sup>, Magdalene Langset<sup>4</sup>, Svenja Neumann<sup>2</sup>, Anna Lippold<sup>2</sup>, France Collard<sup>2</sup>

*1: UiT - The Arctic University of Norway, Department of Arctic and Marine Biology, N-9037 Tromsø, Norway; 2: Norwegian Polar Institute, Fram Centre, N-9296 Tromsø, Norway; 3: Norwegian Institute for Air Research, Fram Centre for Climate and the Environment, Fram Centre, N-9296, Tromsø, Norway; 4: Norwegian Institute for Nature Research, Høgskoleringen 97034 Trondheim, Norway*

**\*Corresponding author: [felix-tulatz@hotmail.com](mailto:felix-tulatz@hotmail.com)**

## **Summary**

**Pages:5; Tables: 2; Figures: 1**

## **Table of contents**

Table S1. Bird characteristics and plastic burdens per bird.

Table S2. Details for plastic characteristics (shapes, polymers, colors).

Figure S1. Comparison of plastic mass between sexes within age groups.

**Table S1.** Information about bird characteristics and plastic burdens per bird for fulmars sampled in Kongsfjorden (Svalbard) in September 2020. The age categories are *Fledglings* (50-60 days old), and *Non-Fledglings* (all fulmars older than fledglings).

| Fulmar ID    | Age           | Sex | Subcutaneous fat depth (mm) | Plastic mass (g) | User plastic mass (g) | Industrial plastic mass (g) |
|--------------|---------------|-----|-----------------------------|------------------|-----------------------|-----------------------------|
| SVA-2020-001 | Fledgling     | F   | 6                           | 0.9043           | 0.8567                | 0.0476                      |
| SVA-2020-002 | Fledgling     | F   | 7.5                         | 0.1707           | 0.1459                | 0.0248                      |
| SVA-2020-003 | Fledgling     | F   | 4.8                         | 0.3135           | 0.2599                | 0.0536                      |
| SVA-2020-004 | Fledgling     | F   | 13.3                        | 0.4905           | 0.4728                | 0.0177                      |
| SVA-2020-005 | Fledgling     | F   | 7.5                         | 0.3889           | 0.3219                | 0.067                       |
| SVA-2020-006 | Fledgling     | F   | 10.9                        | 0.4235           | 0.3849                | 0.0386                      |
| SVA-2020-007 | Fledgling     | F   | 7.5                         | 0.4043           | 0.381                 | 0.0233                      |
| SVA-2020-008 | Fledgling     | F   | 7.3                         | 0.0801           | 0.0801                | 0                           |
| SVA-2020-009 | Fledgling     | F   | 6.5                         | 0.0851           | 0.0661                | 0.019                       |
| SVA-2020-010 | Non-Fledgling | M   | 2.6                         | 0.0881           | 0.077                 | 0.0111                      |
| SVA-2020-011 | Fledgling     | F   | 10.2                        | 0.1623           | 0.127                 | 0.0353                      |
| SVA-2020-012 | Non-Fledgling | M   | 2.8                         | 0                | 0                     | 0                           |
| SVA-2020-013 | Fledgling     | F   | 7                           | 1.0477           | 0.9935                | 0.0542                      |
| SVA-2020-014 | Non-Fledgling | F   | 0.1                         | 0.2113           | 0.0729                | 0.1384                      |
| SVA-2020-015 | Fledgling     | M   | 0.19                        | 1.4667           | 1.414                 | 0.0527                      |
| SVA-2020-016 | Non-Fledgling | M   | 3                           | 0.0305           | 0.0305                | 0                           |
| SVA-2020-017 | Fledgling     | F   | 7.9                         | 0.086            | 0.0778                | 0.0082                      |
| SVA-2020-018 | Fledgling     | M   | 8                           | 0.326            | 0.2864                | 0.0396                      |
| SVA-2020-019 | Non-Fledgling | F   | 2.7                         | 0                | 0                     | 0                           |
| SVA-2020-020 | Fledgling     | M   | 8.8                         | 0.0702           | 0.0505                | 0.0197                      |

|              |               |   |      |        |        |        |
|--------------|---------------|---|------|--------|--------|--------|
| SVA-2020-021 | Fledgling     | M | 7    | 0.0741 | 0.0695 | 0.0046 |
| SVA-2020-022 | Non-Fledgling | M | NA   | 0.0018 | 0.0018 | 0      |
| SVA-2020-023 | Non-Fledgling | M | 5    | 0.023  | 0.023  | 0      |
| SVA-2020-024 | Non-Fledgling | F | 0.1  | 0.1872 | 0.1598 | 0.0274 |
| SVA-2020-025 | Non-Fledgling | M | 3    | 0.1117 | 0.1117 | 0      |
| SVA-2020-026 | Non-Fledgling | F | 2.7  | 0.0025 | 0.0025 | 0      |
| SVA-2020-027 | Fledgling     | M | 8.2  | 0.1703 | 0.1703 | 0      |
| SVA-2020-028 | Non-Fledgling | F | 3.4  | 0.0296 | 0.0296 | 0      |
| SVA-2020-029 | Non-Fledgling | F | NA   | 0.0315 | 0.0315 | 0      |
| SVA-2020-030 | Non-Fledgling | M | 3.4  | 0.0142 | 0.0142 | 0      |
| SVA-2020-031 | Non-Fledgling | M | 2.7  | 0.0223 | 0.0223 | 0      |
| SVA-2020-032 | Non-Fledgling | F | 1.7  | 0.1399 | 0.1399 | 0      |
| SVA-2020-033 | Non-Fledgling | M | 4.6  | 0.0455 | 0.0455 | 0      |
| SVA-2020-034 | Non-Fledgling | F | 0.1  | 0.0053 | 0.0053 | 0      |
| SVA-2020-035 | Fledgling     | M | 6.5  | 0.1037 | 0.1037 | 0      |
| SVA-2020-036 | Fledgling     | M | 9.6  | 0.0607 | 0.0607 | 0      |
| SVA-2020-037 | Fledgling     | F | 11.6 | 0.0156 | 0.0156 | 0      |
| SVA-2020-038 | Non-Fledgling | M | 2.6  | 0.0045 | 0.0045 | 0      |
| SVA-2020-039 | Fledgling     | F | 7.3  | 0.2888 | 0.2566 | 0.0322 |

**Table S2.** Characterization details for plastic particles (> 1mm at longest dimension) found in fulmars sampled in Svalbard 2020. Note that numeric data (n) may have been impacted by methodology (see discussion). Percentage of Occurrence (PO%) is the % of fulmars where a characterization category was found. Average, median, quartiles and maximum are per

fulmar, minimum for all categories is zero. The four plastic pieces in the shape category “others” were two cylindrical hollow plastic beads and two “BB bullets”. The plastic polymers included: PE = polyethylene, PP = polypropylene, PS = polystyrene, PET = polyethylene terephthalate, ABS = acrylonitrile butadiene styrene, PU = polyurethane and PA = polyamide.

|                     | PO % | N    | Relative abundance % | Average $\pm$ SE | Q1  | Median | Q3   | Maximum |
|---------------------|------|------|----------------------|------------------|-----|--------|------|---------|
| <b>Category</b>     |      |      |                      |                  |     |        |      |         |
| <b>Pellets</b>      | 48.7 | 38   | 2.7                  | 1 $\pm$ 0.2      | 0   | 0      | 1.5  | 5       |
| <b>Fragments</b>    | 89.7 | 1126 | 80.1                 | 28.8 $\pm$ 8.8   | 4   | 17.5   | 30.5 | 333     |
| <b>Threads</b>      | 56.4 | 100  | 7.1                  | 2.6 $\pm$ 0.7    | 0   | 1      | 3    | 18      |
| <b>Sheets</b>       | 69.2 | 95   | 6.8                  | 2.4 $\pm$ 0.7    | 0   | 1      | 2    | 25      |
| <b>Foams</b>        | 28.2 | 43   | 3.1                  | 1.1 $\pm$ 0.4    | 0   | 0      | 0    | 14      |
| <b>Others</b>       | 7.7  | 4    | 0.3                  | 0.1 $\pm$ <0.1   | 0   | 0      | 0    | 2       |
| <b>Polymer type</b> |      |      |                      |                  |     |        |      |         |
| <b>PE</b>           | 87.2 | 983  | 70                   | 25.2 $\pm$ 7.6   | 2   | 15     | 26.5 | 291     |
| <b>PP</b>           | 79.5 | 374  | 26.6                 | 9.6 $\pm$ 2.4    | 1.5 | 6      | 11   | 90      |
| <b>PS</b>           | 30.8 | 44   | 3.2                  | 1.1 $\pm$ 0.5    | 0   | 0      | 1    | 14      |
| <b>PET</b>          | 2.6  | 1    | < 0.1                | < 0.1            | 0   | 0      | 0    | 1       |
| <b>ABS</b>          | 2.6  | 1    | < 0.1                | < 0.1            | 0   | 0      | 0    | 1       |
| <b>PU</b>           | 2.6  | 1    | < 0.1                | < 0.1            | 0   | 0      | 0    | 1       |
| <b>PA</b>           | 5.1  | 2    | < 0.1                | < 0.1            | 0   | 0      | 0    | 1       |

| Color        |      |     |      |                |     |    |     |     |
|--------------|------|-----|------|----------------|-----|----|-----|-----|
| White        | 74.4 | 169 | 12   | $4.3 \pm 1.2$  | 0.5 | 2  | 4.5 | 35  |
| Grey         | 33.3 | 37  | 2.6  | $0.9 \pm 0.3$  | 0   | 0  | 1   | 9   |
| Black        | 53.8 | 54  | 3.8  | $1.4 \pm 0.3$  | 0   | 1  | 2   | 6   |
| Blue-Purple  | 43.6 | 29  | 2.1  | $0. \pm 0.2$   | 0   | 0  | 1   | 6   |
| Green        | 41   | 33  | 2.3  | $0.8 \pm 0.3$  | 0   | 0  | 1   | 8   |
| Orange-Brown | 59   | 119 | 8.5  | $3.1 \pm 1$    | 0   | 1  | 3.5 | 36  |
| Red-Pink     | 41   | 34  | 2.4  | $0.9 \pm 0.3$  | 0   | 0  | 1   | 9   |
| Yellow       | 84.6 | 931 | 66.2 | $23.9 \pm 7.3$ | 2   | 13 | 25  | 278 |

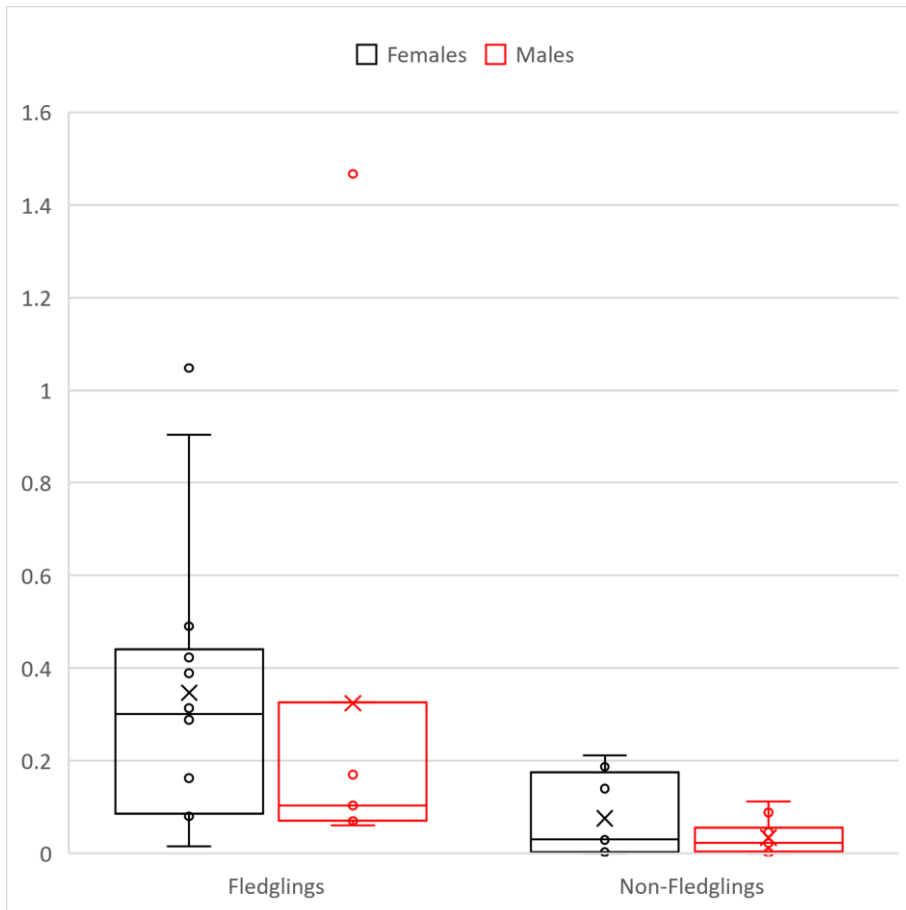

**Figure S1.** Boxplots comparing mass of plastic between sexes within the age categories *Fledglings* and *Non-Fledglings*. The horizontal lines inside the boxes mark the median, and the lower and upper boundary lines of the boxes indicate the first and the third quartiles, respectively. Dots beyond the whiskers represent outliers.
